# Supplementary material for: Sublethal Effects of Imidacloprid on Honey Bee Colony Growth and Activity at Three Sites in the U.S
Source: PubMed Central journal article supplement (PMC5193417; doi:10.1371/journal.pone.0168603), 2016-12-28

S1 Fig. Diagram of treatments for Mississippi trial.

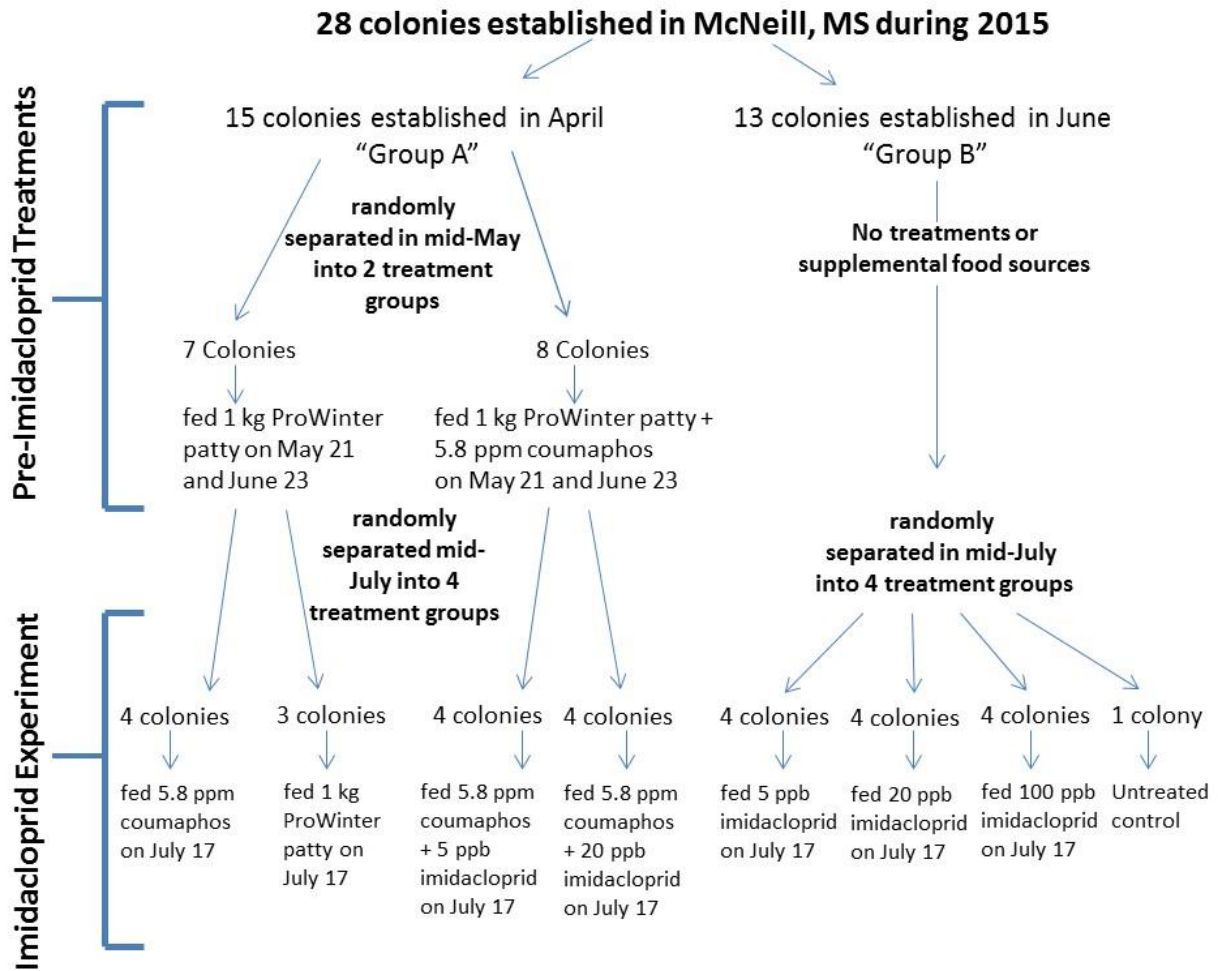

Supplement: pone.0168603.s001.pdf [file pone.0168603.s001.pdf]
