# Supplementary material for: Sublethal Effects of Imidacloprid on Honey Bee Colony Growth and Activity at Three Sites in the U.S
Source: PubMed Central journal article supplement (PMC5193417; doi:10.1371/journal.pone.0168603), 2016-12-28

**Fig. A.** Intercept parameter for a regression-based fit of a Weibull distribution with censoring to bee survivorship in cage studies over two trials. Lines show confidence limits ( $\alpha=0.05$ ).

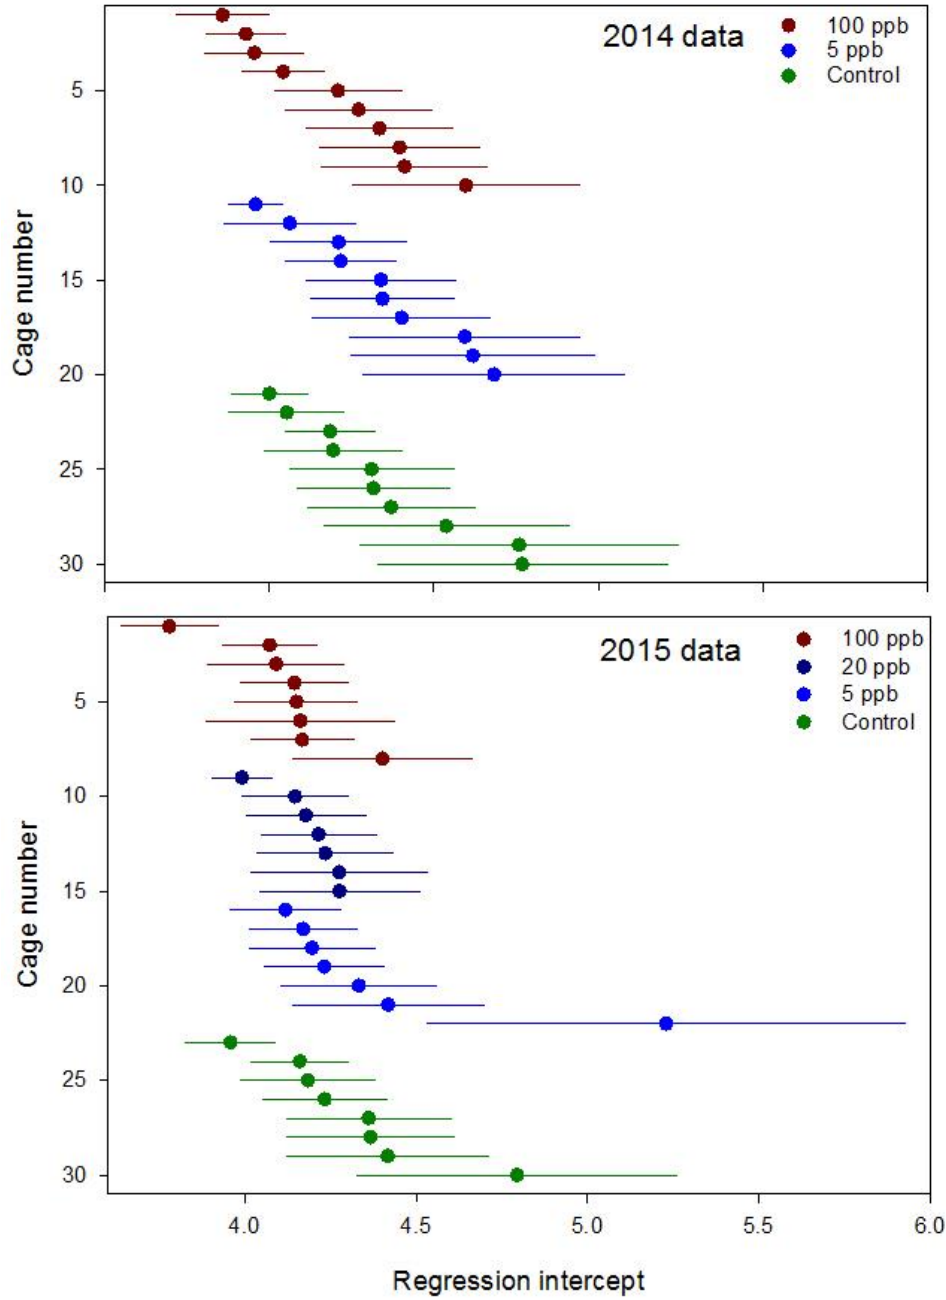

**Fig. B.** Scale parameter for a regression-based fit of a Weibull distribution with censoring to bee survivorship in cage studies over two trials. Lines show confidence limits ( $\alpha=0.05$ ).

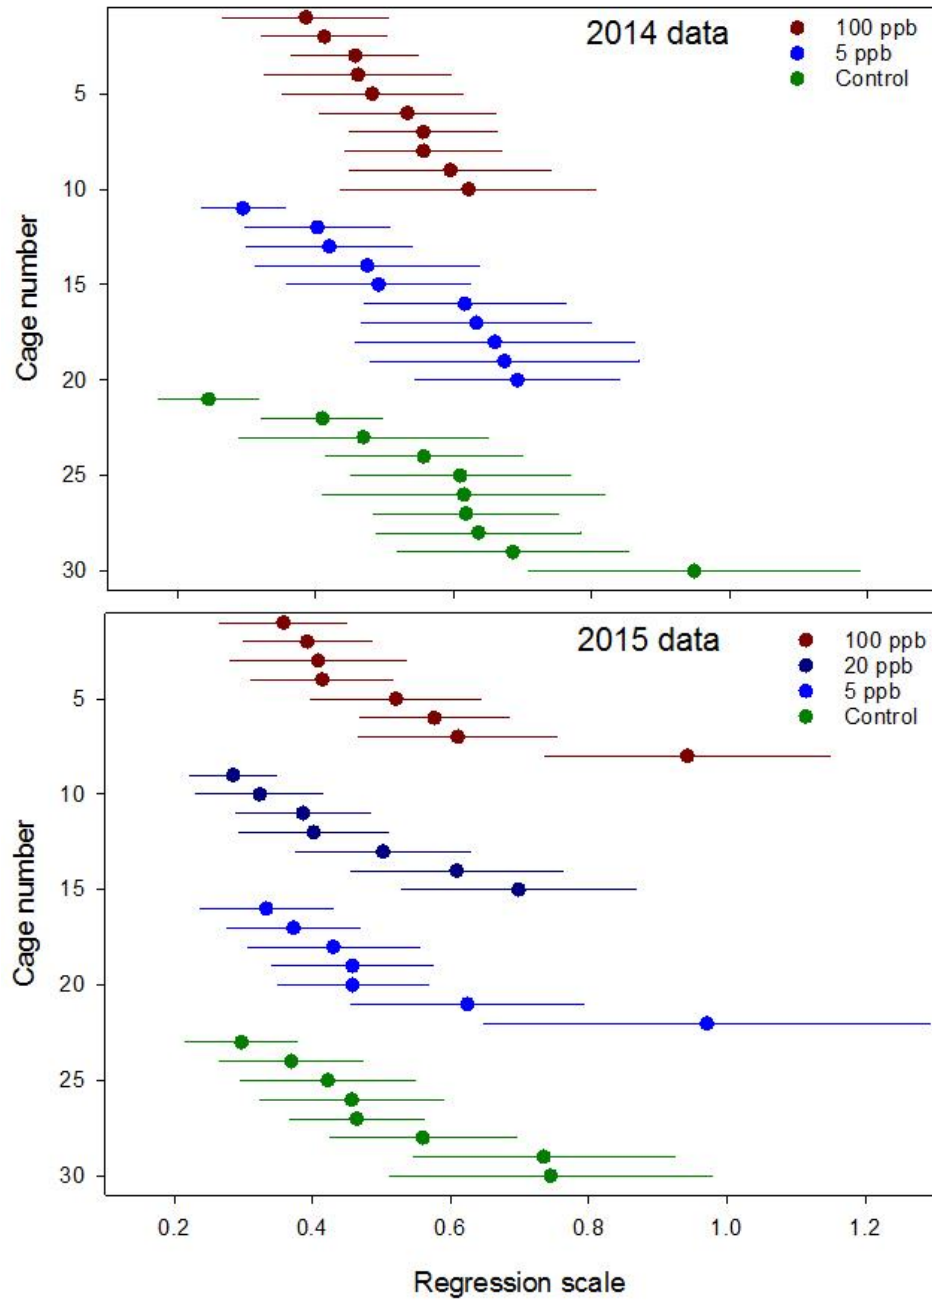

**Fig. C.** Scale parameter, in d, for Weibull distributions with censoring fit to bee survivorship in cage studies over two trials. Lines show confidence limits ( $\alpha=0.05$ ). Note that the confidence limits for one cage of the 5 ppb treatment in the 2015 dataset are only partially shown due to its size.

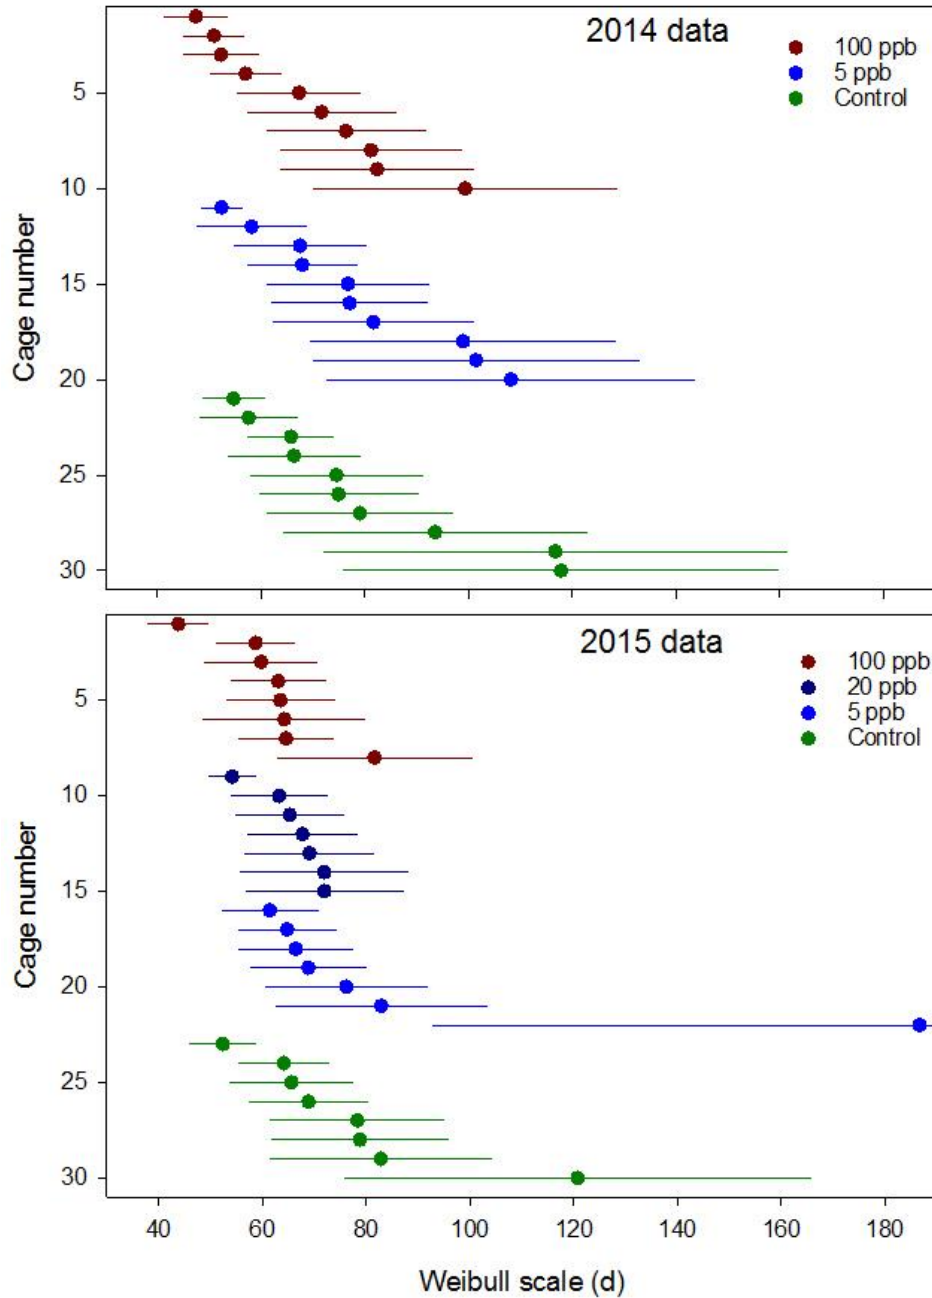

**Fig. D.** Shape parameter for Weibull distributions with censoring fit to bee survivorship in cage studies over two trials. Lines show confidence limits ( $\alpha=0.05$ )

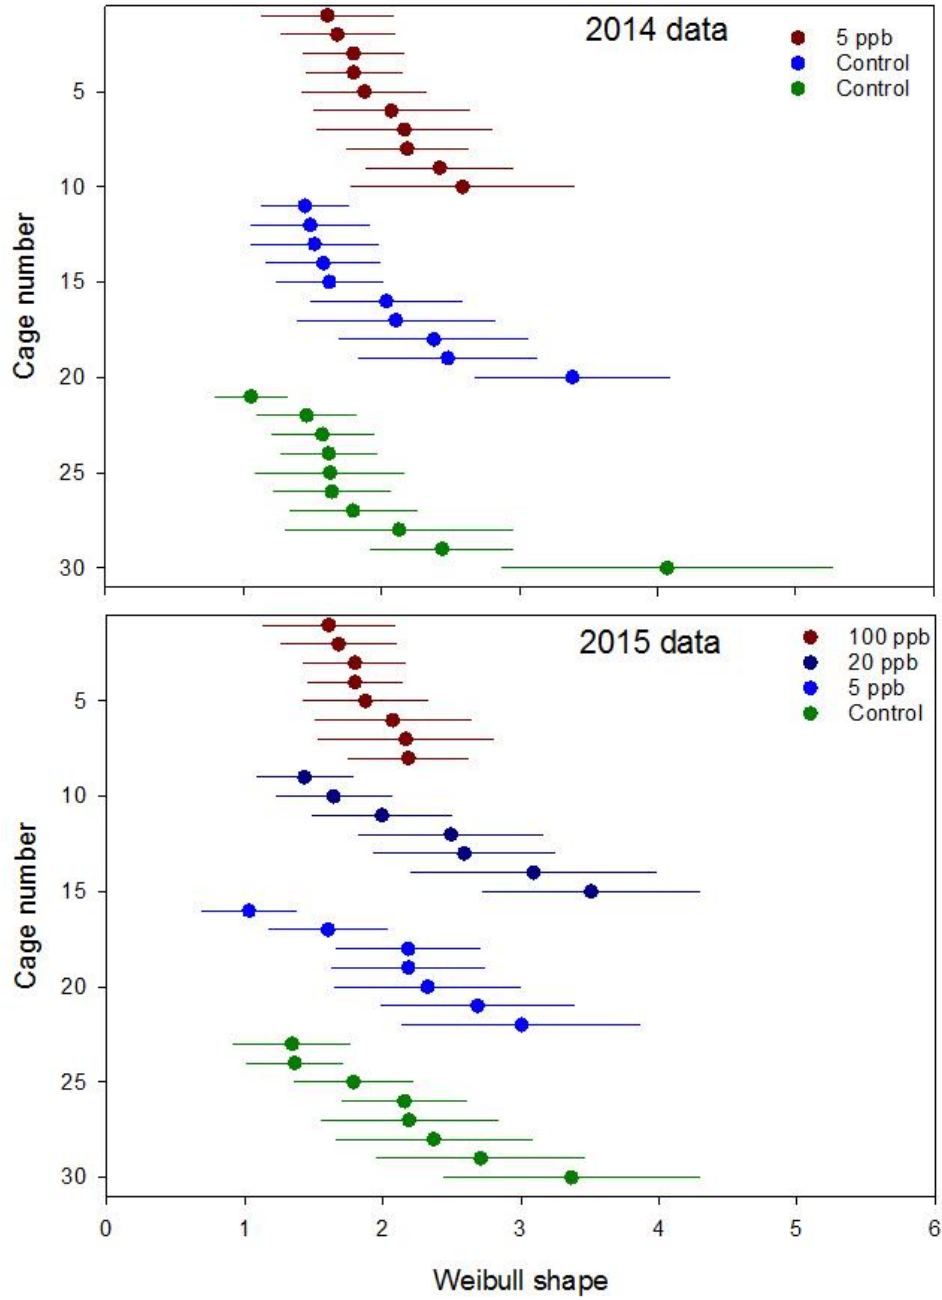

Supplement: pone.0168603.s004.pdf [file pone.0168603.s004.pdf]
