# Supplementary material for: Sublethal Effects of Imidacloprid on Honey Bee Colony Growth and Activity at Three Sites in the U.S
Source: PubMed Central journal article supplement (PMC5193417; doi:10.1371/journal.pone.0168603), 2016-12-28
Supplement: pone.0168603.s005.pdf [file pone.0168603.s005.pdf]

**Table A.** Analysis of hive inspection data from a field experiment conducted in Arizona 2014. “Transf.” refers to the data transformation to improve normality, “Brood area” refers to the surface area of capped brood and “Adult bee population” refers to the total mass of adult bees in kg. “NS” indicates that the “Imidacloprid” factor was not significant at  $\alpha=0.05$ ; the main effects for those analyses are shown. Analyses were conducted using mixed-model ANOVA, with adult bee population estimates prior to treatment used as covariates. For each analysis, an appropriate covariance structure was chosen using the Akaike Information Criterion. Degrees of freedom were calculated using the Kenward-Roger method.

| Period              | Dep. var.            | Transf. | Covar. struct. | Factors                                   | Num. d.f.                        | Den. d.f. | F      | P       |
|---------------------|----------------------|---------|----------------|-------------------------------------------|----------------------------------|-----------|--------|---------|
| During treat        | Brood area           | none    | -              | Imidacloprid                              | 2                                | 9         | 14.41  | 0.0016  |
|                     | Frame wt.            |         |                | Imid., Date, Pre-treat frame wt.          |                                  |           |        | NS      |
| Post treat          | Adult bee population | none    | ante(1)        | Imidacloprid                              | 2                                | 21.9      | 4.65   | 0.0028  |
|                     |                      |         |                | Date                                      | 2                                | 15.5      | 260.87 | <0.0001 |
|                     |                      |         |                | Imid.*Date                                | 4                                | 17.5      | 2.85   | 0.0709  |
|                     |                      |         |                | Pre-treat adult bee population            | 1                                | 26        | 1.93   | 0.0203  |
|                     | Brood area           | none    | un             | Imidacloprid                              | 2                                | 27        | 14.96  | <0.0001 |
|                     |                      |         |                | Date                                      | 2                                | 27        | 23.58  | <0.0001 |
|                     |                      |         |                | Imid.*Date                                | 4                                | 27        | 5.22   | 0.0030  |
|                     | Frame wt.            | none    | un             | Imidacloprid                              | 2                                | 26        | 5.45   | 0.0106  |
|                     |                      |         |                | Date                                      | 2                                | 8.0       | 3.70   | 0.0730  |
|                     |                      |         |                | Imid.*Date                                | 4                                | 8.9       | 2.88   | 0.0873  |
| Pre-treat frame wt. |                      |         |                | 1                                         | 26                               | 4.13      | 0.0524 |         |
| Post winter         | Adult bee population |         |                | Imid., Date, Pre-treat ad. bee population |                                  |           |        | NS      |
|                     | Brood area           | Sq. rt. | un             | Imidacloprid                              | 2                                | 8         | 6.86   | 0.0184  |
|                     |                      |         |                | Date                                      | 1                                | 8         | 26.57  | 0.0009  |
|                     |                      |         |                | Imid.*Date                                | 2                                | 8         | 1.17   | 0.3591  |
|                     | Frame wt.            |         |                |                                           | Imid., Date, Pre-treat frame wt. |           |        |         |

**Table B.** Post hoc contrast results for imidacloprid exposure on hive inspection data from a field experiment conducted in Arizona 2014. “Value” refers to the value of the contrast. Dashes indicate there was no significant main effect.

| Time period  | Contrast     | Adult bee population |        | Brood |         | Frame wt. |        |
|--------------|--------------|----------------------|--------|-------|---------|-----------|--------|
|              |              | Value                | P      | Value | P       | Value     | P      |
| During treat | 100 vs 5 ppb | -                    | -      | -1359 | 0.0077  | -         | -      |
|              | 100 vs 0 ppb | -                    | -      | -1658 | 0.0021  | -         | -      |
|              | 5 vs 0 ppb   | -                    | -      | -299  | 1.000   | -         | -      |
| Post treat   | 100 vs 5 ppb | -553                 | 0.063  | -945  | <0.0001 | -409      | 0.0175 |
|              | 100 vs 0 ppb | -745                 | 0.0024 | -749  | 0.0015  | -342      | 0.0560 |
|              | 5 vs 0 ppb   | -193                 | 1.000  | 196   | 0.93    | 67        | 1.0000 |
| Winter       | 100 vs 5 ppb | -                    | -      | -20.6 | 0.0349  | -         | -      |
|              | 100 vs 0 ppb | -                    | -      | -20.9 | 0.0321  | -         | -      |
|              | 5 vs 0 ppb   | -                    | -      | -0.4  | 1.000   | -         | -      |
