# Supplementary material for: Sublethal Effects of Imidacloprid on Honey Bee Colony Growth and Activity at Three Sites in the U.S
Source: PubMed Central journal article supplement (PMC5193417; doi:10.1371/journal.pone.0168603), 2016-12-28
Supplement: pone.0168603.s006.pdf [file pone.0168603.s006.pdf]

**Table A.** Statistical results for continuous weight and temperature data from a field experiment conducted in Arizona 2014. “Transf.” refers to the data transformation to improve normality, “Brood area” refers to the surface area of capped brood and “Adult bee population” refers to the total mass of adult bees in kg. “NS” indicates that the “Imidacloprid” factor was not significant at  $\alpha=0.05$ ; the main effects for those analyses are provided. Analyses were conducted using mixed-model ANOVA, with adult bee population estimates prior to treatment used as a covariate. For each analysis, an appropriate covariance structure was chosen using the Akaike Information Criterion. Degrees of freedom were calculated using the Kenward-Roger method.

| Period     | Dep. var.    | Transf. | Covar. struct. | Factors                           | Num. d.f. | Den. d.f. | F     | P       |
|------------|--------------|---------|----------------|-----------------------------------|-----------|-----------|-------|---------|
| Post treat | Weight ampl. | log     | ante(1)        | Imidacloprid                      | 2         | 25.61     | 16.83 | <0.0001 |
|            |              |         |                | Date                              | 11        | 16.12     | 33.27 | <0.0001 |
|            |              |         |                | Imid.*Date                        | 22        | 20.42     | 1.39  | 0.2285  |
|            |              |         |                | Adult bee population              | 1         | 26.83     | 20.23 | 0.0001  |
| Post treat | Temp. ampl.  |         |                | Imid., Date                       |           |           |       | NS      |
|            | Temp. avg.   |         |                | Imid., Date, Adult bee population |           |           |       | NS      |
| Winter     | Temp. ampl.  | log     | ante(1)        | Imidacloprid                      | 2         | 10.13     | 5.92  | 0.0198  |
|            |              |         |                | Date                              | 15        | 18.41     | 8.47  | <0.0001 |
|            |              |         |                | Imid.*Date                        | 30        | 22.76     | 0.66  | 0.8600  |
|            |              |         |                | Adult bee population              | 1         | 13.96     | 0.27  | 0.6131  |
|            | Temp. avg    |         |                | Imid., Date, Adult bee population |           |           |       | NS      |

**Table B.** Post hoc contrast results for imidacloprid exposure on continuous weight and temperature data from a field experiment conducted in Arizona 2014. “Value” refers to the value of the contrast. Dashes indicate there was no significant main effect. “NA” indicates the analysis was not conducted; weight amplitudes are a function of foraging traffic and honey bees generally do not forage in winter.

| Period     | Contrast     | Hive weight amplitudes |         | Temperature amplitudes |        |
|------------|--------------|------------------------|---------|------------------------|--------|
|            |              | Value                  | P       | Value                  | P      |
| Post treat | 100 vs 5 ppb | -0.216                 | <0.0001 | -                      | -      |
|            | 100 vs 0 ppb | -0.027                 | 1.000   | -                      | -      |
|            | 5 vs 0 ppb   | 0.189                  | 0.0004  | -                      | -      |
| Winter     | 100 vs 5 ppb | NA                     |         | 0.485                  | 0.0186 |
|            | 100 vs 0 ppb | NA                     |         | 0.2381                 | 0.3801 |
|            | 5 vs 0 ppb   | NA                     |         | -0.2464                | 0.3400 |
