# Supplementary material for: Sublethal Effects of Imidacloprid on Honey Bee Colony Growth and Activity at Three Sites in the U.S
Source: PubMed Central journal article supplement (PMC5193417; doi:10.1371/journal.pone.0168603), 2016-12-28
Supplement: pone.0168603.s008.pdf [file pone.0168603.s008.pdf]

**Table A.** Analysis of a field experiment conducted in Mississippi 2015. “Transf.” refers to the data transformation to improve normality, and “Brood area” refers to the surface area of capped brood. “NS” indicates that the “Imidacloprid” factor was not significant at  $\alpha=0.05$ ; the main effects for those analyses are provided. Analyses were conducted using mixed-model ANOVA, with adult bee population estimates prior to treatment used as covariates. For each analysis, an appropriate covariance structure was chosen using the Akaike Information Criterion. Degrees of freedom were calculated using the Kenward-Roger method.

| Period        | Dep. var.  | Transf. | Covar. struct. | Factors         | Num. d.f. | Den. d.f. | F     | P       |
|---------------|------------|---------|----------------|-----------------|-----------|-----------|-------|---------|
| Apr.-<br>July | Brood area |         |                | Coumaphos, Date |           |           |       | NS      |
| Aug.-<br>Nov. | Brood area | none    | ante(1)        | Coumaphos       | 1         | 19.34     | 3.11  | 0.0934  |
|               |            |         |                | Imidacloprid    | 2         | 18.23     | 3.7   | 0.0449  |
|               |            |         |                | Couma*Imid      | 2         | 17.64     | 8.72  | 0.0023  |
|               |            |         |                | Date            | 2         | 53        | 42.47 | <0.0001 |
|               |            |         |                | Date*Couma      | 2         | 53        | 4.29  | 0.0188  |
|               |            |         |                | Date *Imid      | 4         | 53        | 3.07  | 0.024   |
|               |            |         |                | Date*Couma*Imid | 4         | 53        | 0.64  | 0.636   |
|               |            |         |                | Occupied spaces | 1         | 18.9      | 0.72  | 0.4073  |

**Table B.** Post hoc contrast results (1<sup>st</sup> group – 2<sup>nd</sup> group) for the effects of imidacloprid exposure on capped brood data from a field experiment conducted in Mississippi 2015. “Couma” refers to the presence or absence of added coumaphos to the bee diet in the spring, “Imida” refers to the concentration of imidacloprid in ppb in sugar syrup fed to bees in July and August. “Value” refers to the value of the contrast.

| 1 <sup>st</sup> group |       | 2 <sup>nd</sup> group |       | Capped brood area |       |
|-----------------------|-------|-----------------------|-------|-------------------|-------|
| Couma                 | Imida | Couma                 | Imida | Value             | P     |
| no                    | 0     | no                    | 5     | 69.85             | 0.584 |
| no                    | 0     | no                    | 20    | 91.37             | 0.052 |
| no                    | 0     | yes                   | 0     | 47.46             | 1.000 |
| no                    | 0     | yes                   | 5     | -31.97            | 1.000 |
| no                    | 0     | yes                   | 20    | 34.14             | 1.000 |
| no                    | 5     | yes                   | 0     | -22.39            | 1.000 |
| no                    | 5     | yes                   | 5     | -101.82           | 0.090 |
| no                    | 5     | yes                   | 20    | -35.71            | 1.000 |
| no                    | 20    | no                    | 5     | -21.52            | 1.000 |
| no                    | 20    | yes                   | 0     | -43.91            | 1.000 |
| no                    | 20    | yes                   | 5     | -123.34           | 0.005 |
| no                    | 20    | yes                   | 20    | -57.23            | 0.962 |
| yes                   | 0     | yes                   | 5     | -79.44            | 0.114 |
| yes                   | 0     | yes                   | 20    | -13.33            | 1.000 |
| yes                   | 20    | yes                   | 5     | -66.11            | 0.255 |
