# Supplementary material for: Sublethal Effects of Imidacloprid on Honey Bee Colony Growth and Activity at Three Sites in the U.S
Source: PubMed Central journal article supplement (PMC5193417; doi:10.1371/journal.pone.0168603), 2016-12-28
Supplement: pone.0168603.s010.pdf [file pone.0168603.s010.pdf]

**S1 Table.** Summary of experimental designs.

| Site      | Experiment dates      | Treatment dates  | Treatment groups                                        | Total no. replicates                      | Sampling occasions                  | Response variables                                                                                                                        | Residue analyses               |
|-----------|-----------------------|------------------|---------------------------------------------------------|-------------------------------------------|-------------------------------------|-------------------------------------------------------------------------------------------------------------------------------------------|--------------------------------|
| AZ        | 9 Sept.-31 Oct. 2014  | 16 Sept.-31 Oct. | 0, 5 and 100 ppb imidacloprid                           | 30 cages                                  | Daily mortality; weekly consumption | Survivorship; syrup and water consumption                                                                                                 | Adult bees                     |
| AZ        | 27 July-16 Sept. 2015 | 3 Aug.-16 Sept.  | 0, 5, 20 and 100 ppb imidacloprid                       | 30 cages                                  | Same as above                       | Same as above                                                                                                                             | Same as above                  |
| AZ        | May 2014-Mar. 2015    | 17 July-26 Aug.  | 0, 5 and 100 ppb imidacloprid                           | 12 colonies                               | Monthly except Dec. and Jan.        | Adult bee population; capped brood area; frame weight; continuous hive weight amplitudes; temperature average and amplitudes; Varroa fall | Adult bees; wax; honey         |
| AZ        | May–Aug. 2015         | 9 July-25 Aug.   | 0, 5, 20 and 100 ppb imidacloprid                       | 16 colonies                               | Monthly                             | Same as above                                                                                                                             | Same as above                  |
| AR        | May-Nov. 2015         | Same as above    | Same as above                                           | Same as above                             | Same as above                       | Capped brood area; frame weight; total hive weight                                                                                        | Adult bees; wax; honey; pollen |
| MS-part 1 | Apr.-Oct. 2015        | 21 May-21 June   | 0 and 5.8 ppm coumaphos                                 | 15 colonies                               | Same as above                       | Capped brood area; frame spaces; Varroa density                                                                                           | Adult bees; honey              |
| MS-part 2 | June-Oct. 2015        | 17 July-19 Aug.  | 0, 5, 20 and 100 ppb imidacloprid and 5.8 ppm coumaphos | Colonies from MS- part 1 plus 13 colonies | Same as above                       | Same as above                                                                                                                             | Adult bees; honey              |
