# Supplementary material for: Sublethal Effects of Imidacloprid on Honey Bee Colony Growth and Activity at Three Sites in the U.S
Source: PubMed Central journal article supplement (PMC5193417; doi:10.1371/journal.pone.0168603), 2016-12-28
Supplement: pone.0168603.s012.pdf [file pone.0168603.s012.pdf]

**S3 Table.** Analysis of select parameters from Weibull distributions to cage survivorship data. Denominator degrees of freedom were 47 for the first analysis and 26 for the second.

| Datasets  | Factors       | Num.<br>d.f. | 30 <sup>th</sup> percentile |        | 50 <sup>th</sup> percentile |        | 30 <sup>th</sup> -40 <sup>th</sup> percentiles |        |
|-----------|---------------|--------------|-----------------------------|--------|-----------------------------|--------|------------------------------------------------|--------|
|           |               |              | F                           | P      | F                           | P      | F                                              | P      |
| 2014+2015 | Treatment     | 2            | 2.49                        | 0.0940 | 2.80                        | 0.0707 | 0.85                                           | 0.4381 |
|           | Year          | 1            | 0.01                        | 0.9318 | 0.02                        | 0.8876 | 0.11                                           | 0.7388 |
|           | Treat. x Year | 2            | 0.39                        | 0.6788 | 0.41                        | 0.6641 | 0.30                                           | 0.7463 |
| 2015      | Treatment     | 3            | 2.25                        | 0.1058 | 1.83                        | 0.1665 | 0.93                                           | 0.4365 |
